# Supplementary material for: Nitrogen and Phosphorus Limitation over Long-Term Ecosystem Development in Terrestrial Ecosystems
Source: PubMed Central journal article supplement (PMC3411694; doi:10.1371/journal.pone.0042045), 2012-08-03

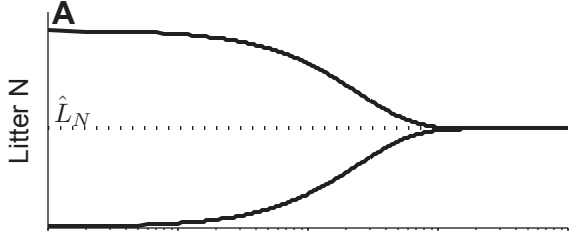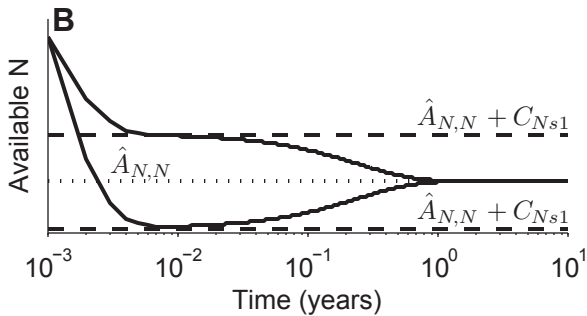

Supplement: pone.0042045.s001.pdf [file pone.0042045.s001.pdf]
